# Supplementary material for: Deactivation and regeneration of carbon nanotubes and nitrogen-doped carbon nanotubes in catalytic peroxymonosulfate activation for phenol degradation: variation of surface functionalities
Source: Royal Society of Chemistry journal article supplement (doi:10.1039/c8ra07696k), 2019-01-01
Supplement: c8ra07696k1.pdf [file c8ra07696k1.pdf]

**Electronic supplementary information**

for

**Deactivation and regeneration of carbon nanotube and nitrogen doped carbon  
nanotube in catalytic peroxymonosulfate activation for phenol degradation:  
Variation of surface functionalities**

Jifei Hou, Lixia Xu, Yuxiang Han, Yuqiong Tang, Haiqin Wan, Zhaoyi Xu, Shourong  
Zheng\*

*State Key Laboratory of Pollution Control and Resource Reuse, Jiangsu Key  
Laboratory of Vehicle Emissions Control, School of the Environment, Nanjing  
University, Nanjing 210093, PR China*

\*Corresponding author. Tel: +86-25-89680373; Fax: +86-25-89680596.

*E-mail:* srzheng@nju.edu.cn (Shourong Zheng)

**Table S1.** Specific surface areas ( $S_{\text{BET}}$ ) and pore volumes ( $V_{\text{t}}$ ) of CNT and NCNT samples

| Sample    | $S_{\text{BET}}$ ( $\text{m}^2 \text{g}^{-1}$ ) | $V_{\text{t}}^{\text{a}}$ ( $\text{cm}^3 \text{g}^{-1}$ ) | Sample     | $S_{\text{BET}}$ ( $\text{m}^2 \text{g}^{-1}$ ) | $V_{\text{t}}$ ( $\text{cm}^3 \text{g}^{-1}$ ) |
|-----------|-------------------------------------------------|-----------------------------------------------------------|------------|-------------------------------------------------|------------------------------------------------|
| CNT-750   | 103.3                                           | 0.25                                                      | NCNT-750   | 105.3                                           | 0.29                                           |
| U-CNT-1   | 97.5                                            | 0.24                                                      | U-NCNT-1   | 104.1                                           | 0.26                                           |
| U-CNT-2   | 103.1                                           | 0.29                                                      | U-NCNT-2   | 99.7                                            | 0.26                                           |
| U-CNT-3   | 98.3                                            | 0.26                                                      | U-NCNT-3   | 100.6                                           | 0.28                                           |
| U-CNT-4   | 97.0                                            | 0.25                                                      | U-NCNT-4   | 106.4                                           | 0.30                                           |
| T-CNT-350 | 100.1                                           | 0.26                                                      | T-NCNT-350 | 101.5                                           | 0.28                                           |
| T-CNT-550 | 92.4                                            | 0.23                                                      | T-NCNT-550 | 115.1                                           | 0.30                                           |
| T-CNT-750 | 101.4                                           | 0.33                                                      | T-NCNT-750 | 106.3                                           | 0.29                                           |
| R-CNT     | 102.4                                           | 0.29                                                      | R-NCNT     | 108.8                                           | 0.37                                           |
| O-CNT-1   | 101.4                                           | 0.29                                                      | O-NCNT-1   | 101.4                                           | 0.29                                           |

<sup>a</sup>  $V_{\text{t}}$ : pore volume at  $P/P_0=0.97$

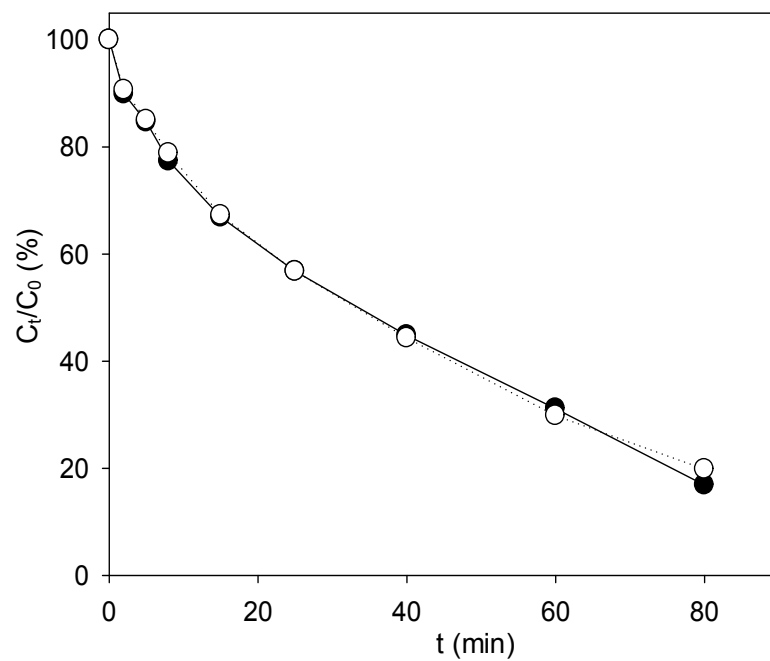

**Fig. S1** Two separate runs of phenol degradation on CNT-750

Reaction conditions:  $[PMS]_0 = 8 \text{ mM}$ ;  $[\text{phenol}]_0 = 0.106 \text{ mM}$ ; catalyst =  $0.1 \text{ g L}^{-1}$

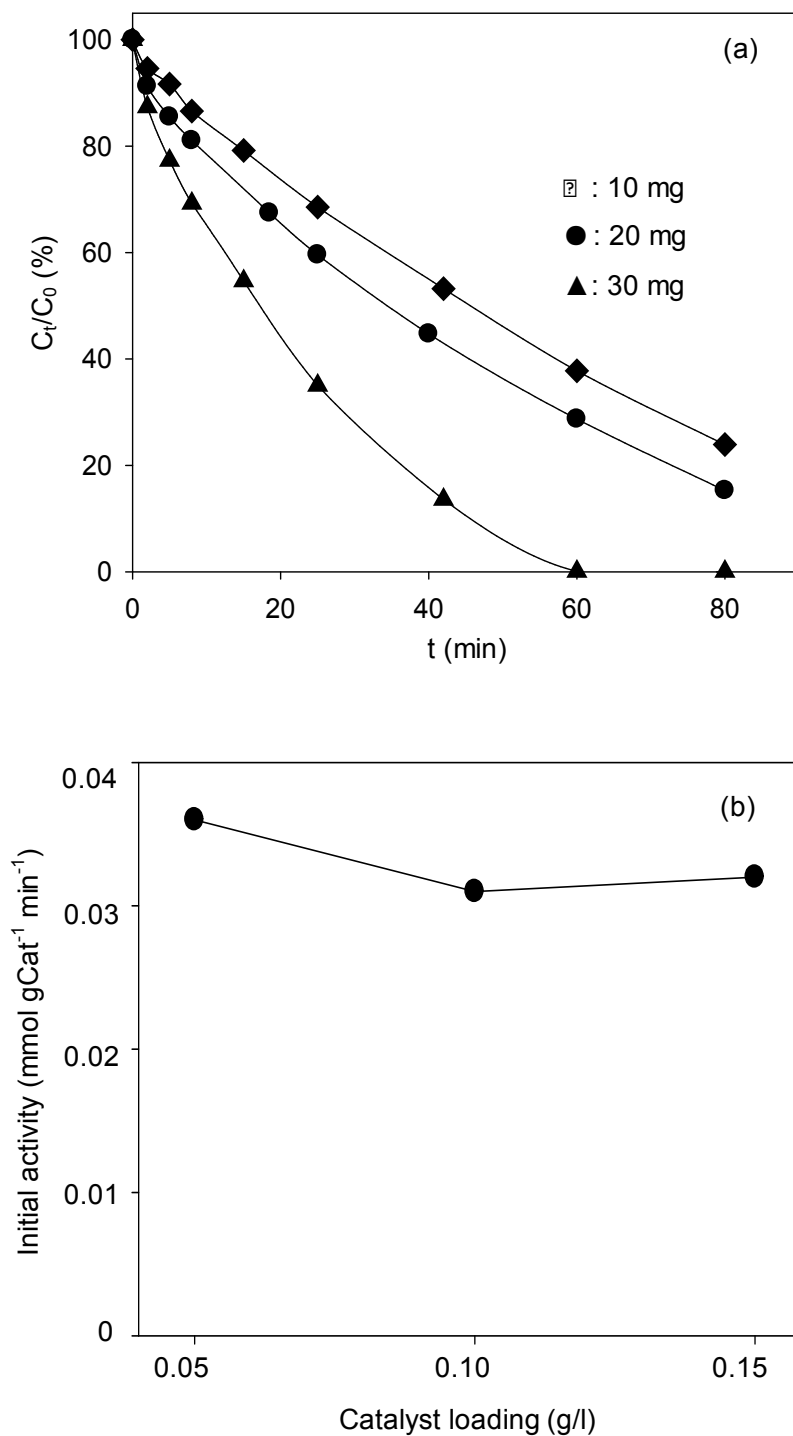

**Fig. S2** Effect of CNT-750 dosage on (a) phenol removal and (b) normalized initial activity

Reaction conditions:  $[PMS]_0 = 8$  mM;  $[phenol]_0 = 0.106$  mM
